# Supplementary material for: Unconjugated Multi-Epitope Peptides Adjuvanted with ALFQ Induce Durable and Broadly Reactive Antibodies to Human and Avian Influenza Viruses
Source: MDPI journal article supplement (doi:10.3390/vaccines11091468), 2023-09-08
Supplement: s1 [file s1]

## Supplemental Figures:

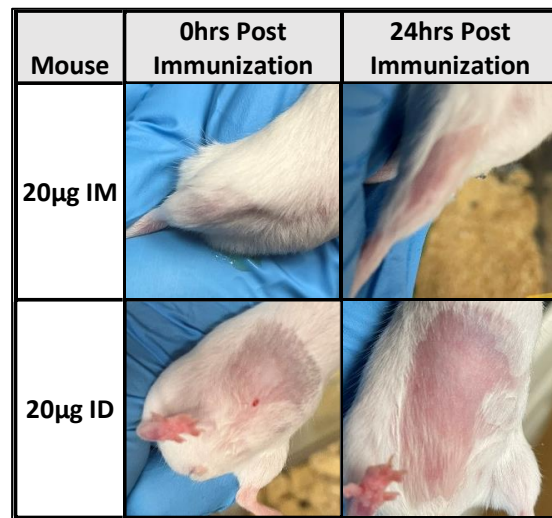

**Supplemental Figure S1.** Representative images of injection sites in mice immunized with 20 µg of LHNVD-105, administered either intramuscularly or intradermally. Post-immunization images were taken immediately, 24hrs and 72hrs after primary immunization.

| Types/Subtypes | Clade    | Strains                                                                    | Annotation              |
|----------------|----------|----------------------------------------------------------------------------|-------------------------|
| A/H1N1         | *        | live A/California/07/2009pdm09                                             | A/Cal/07/09pdm09        |
|                | **       | live A/California/04/2009pdm09                                             | *A/Cal/04/09pdm09       |
|                | 6B.1     | live A/Michigan/45/2015pdm09                                               | A/Mich/45/15pdm09       |
|                | 6B.1A.5  | live A/Wisconsin/505/2018pdm09                                             | *A/Wisc/505/18pdm09     |
| A/H3N2         | 3C.2a    | live A/Hong Kong/4801/2014                                                 | A/HK/4801/14            |
|                | 3C.1     | live A/Victoria/361/2011                                                   | A/Vict/361/11           |
|                | 3C.1     | live A/Texas/50/2012                                                       | A/Texas/50/12           |
| A/H5N1 (avian) | 2.3.2.1a | BPL-inactivated A/India/NIV/2006-PR8-IBCDC-RG7                             | A/Ind/NIV/06            |
|                | 2.2.1    | BPL-inactivated Influenza A/Egypt/321/2007 x PR8-IDCDC-RG11                | A/Egypt/321/07          |
|                | 2.3.4    | BPL-inactivated Influenza A/Anhui/01/2005 x PR8-IBCDC-RG6                  | A/Anhui/01/05           |
|                | 1        | BPL-inactivated Influenza A/Vietnam/1203/2004 x PR8-CDC-RG/GLP             | A/Vietnam/1203/04       |
|                | 2.3.2.1  | BPL-inactivated Influenza A/Hubei/1/2010 x PR8-IDCDC-RG30                  | A/Hubei/01/10           |
|                | 7.1      | BPL-inactivated Influenza A/chicken/Vietnam/NCVD-016/2008 x PR8-IDCDC-RG12 | A/chicken/Vietnam/16/08 |
| B/Victoria     |          | live B/New Hampshire/01/2021                                               | B/NHamp/01/21           |
| B/Yamagata     |          | live B/Oklahoma/10/2018                                                    | B/OK/10/18              |
|                |          | live B/Bangladesh/5972/2007                                                | B/Bangld/5972/07        |

\* 2010-2016 vaccine strain

\*\*Reference virus

**Supplemental Table S1:** Influenza virus strains

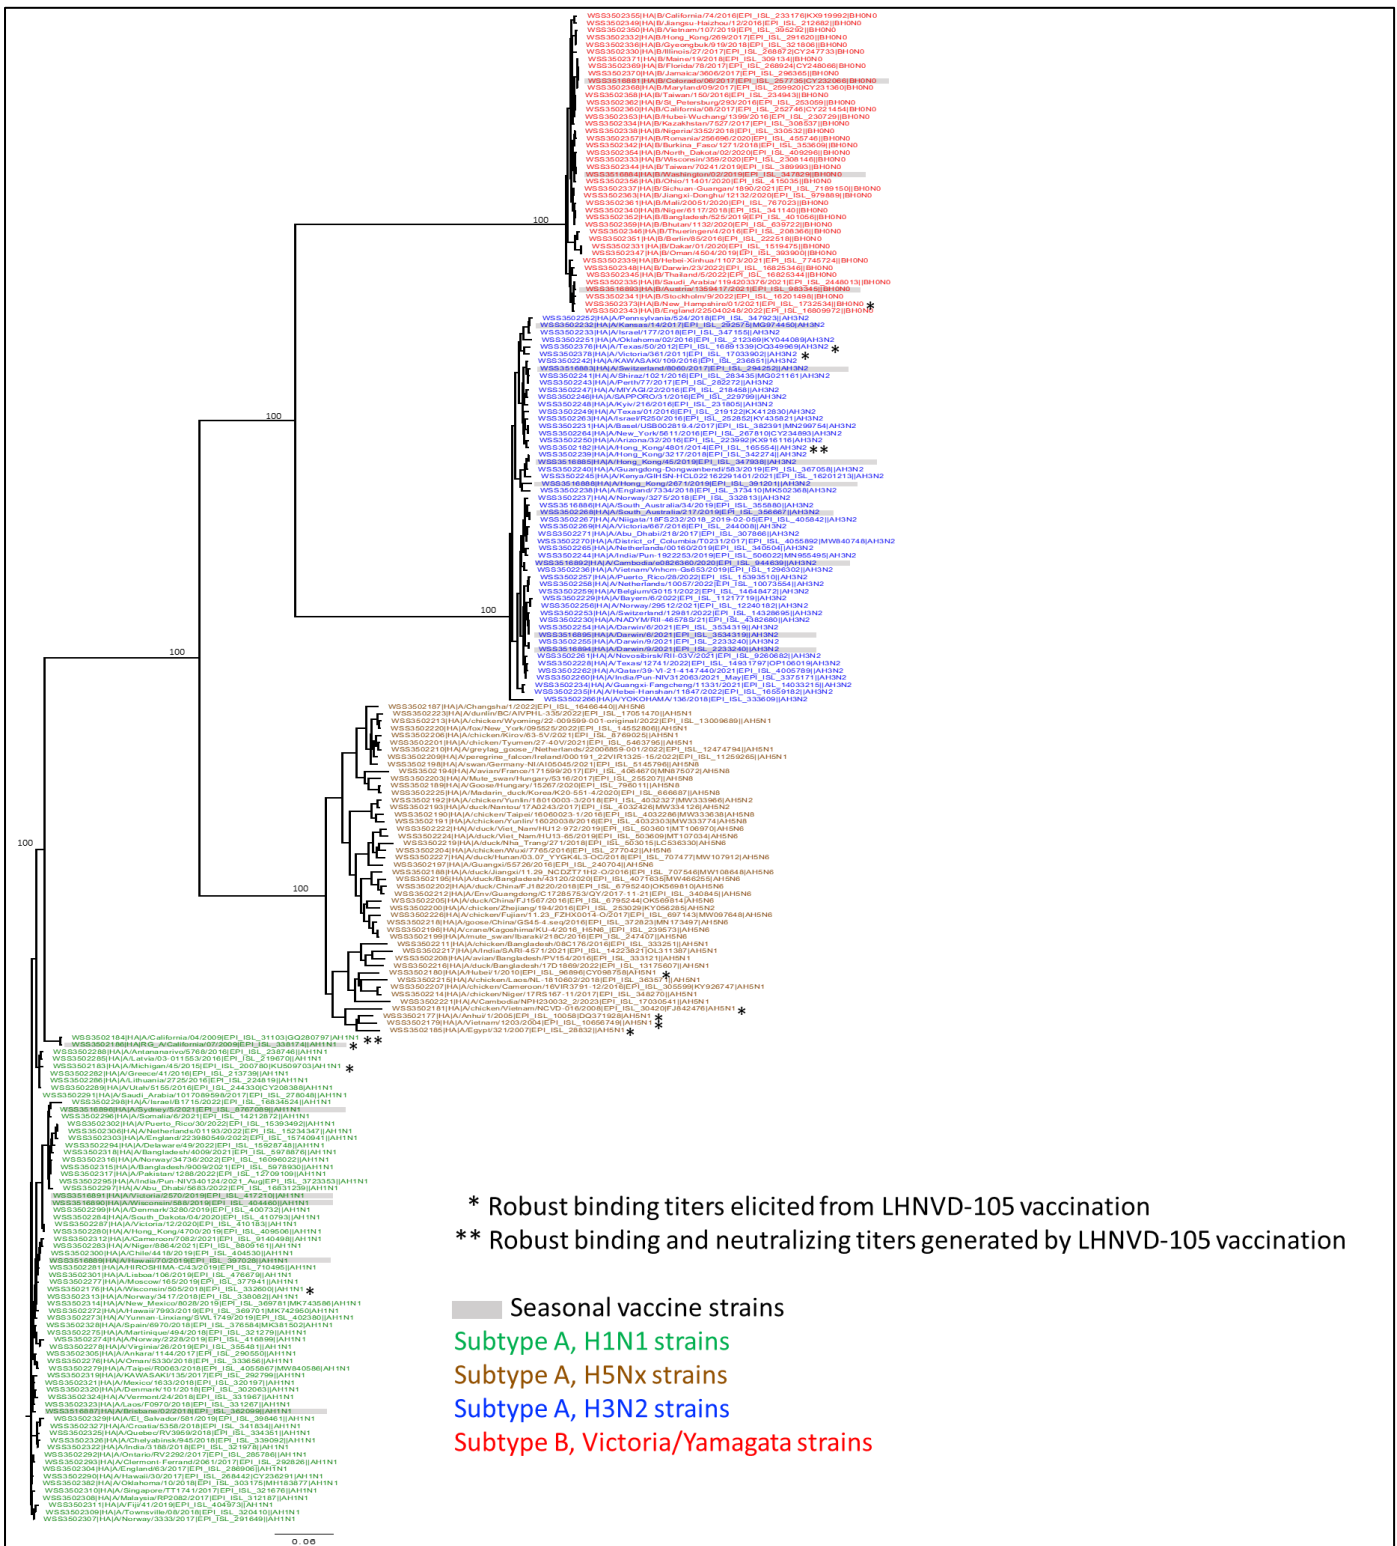

**Supplemental Figure S2:** Neighbor-joining trees based on pairwise distance of influenza strains for which binding (\*) and neutralizing (\*\*) antibody titers were generated *in vivo* after LHNVD-105 immunization. Bootstrap value of 100 are shown. Green = Subtype A H1N1 strains. Brown = Subtype A H5Nx strains. Blue = Subtype A H3N2 strains. Red = Subtype B Victoria/Yamagata strains. Grey = Seasonal vaccine strains. EPI\_SET Identifier can be found in taxa.
